# Supplementary material
Source: MDPI journal article supplement (https://www.mdpi.com/2073-4433/13/5/694)
Supplement: s1 [file s1]

Article

# Seasonal Changes in Urban PM<sub>2.5</sub> Hotspots and Sources from Low-Cost Sensors

Lorenz Harr <sup>1,\*</sup>, Tim Sinsel <sup>1</sup>, Helge Simon <sup>1</sup> and Jan Esper <sup>1,2</sup>

<sup>1</sup> Department of Geography, Johannes Gutenberg-University, Johann-Joachim-Becher-Weg 21, 55128 Mainz, Germany; t.sinsel@geo.uni-mainz.de (T.S.); h.simon@geo.uni-mainz.de (H.S.); esper@uni-mainz.de (J.E.)

<sup>2</sup> Global Change Research Institute of the Czech Academy of Sciences (CzechGlobe), 60300 Brno, Czech Republic

\* Correspondence: l.harr@geo.uni-mainz.de; Tel.: +49-6131-39-29-803

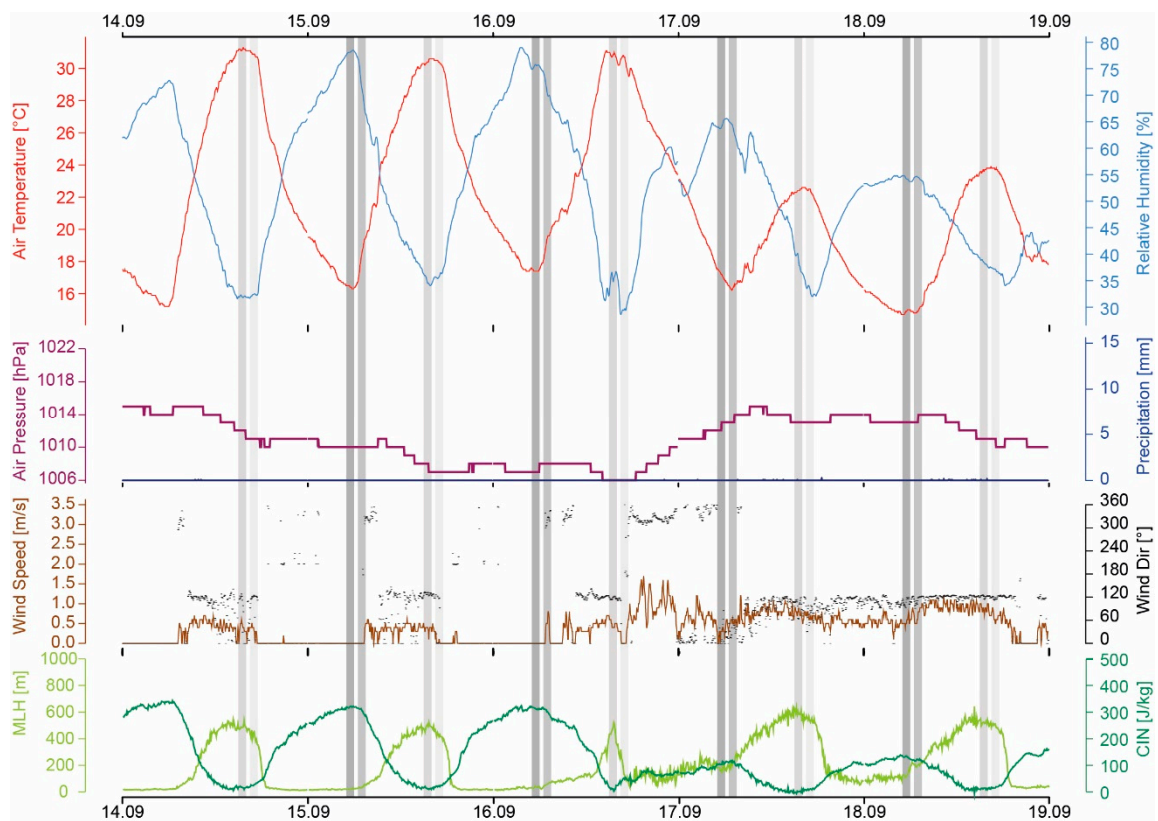

**Figure S1.** weather conditions during September measurement period. Grey bars represent daily measurement runs. Relative humidity, air temperature, and air pressure were measured at 2 m a.g.l. at the measurement station Mainz-Zitadelle, wind direction and speed at 10 m a.g.l and precipitation at 2 m a.g.l. at the measurement station Mainz-Mombach. The convective inhibition (CIN) and the mixing layer height (MLH) were measured with a radiometer at the headquarter of the state office for environment in Mainz.:

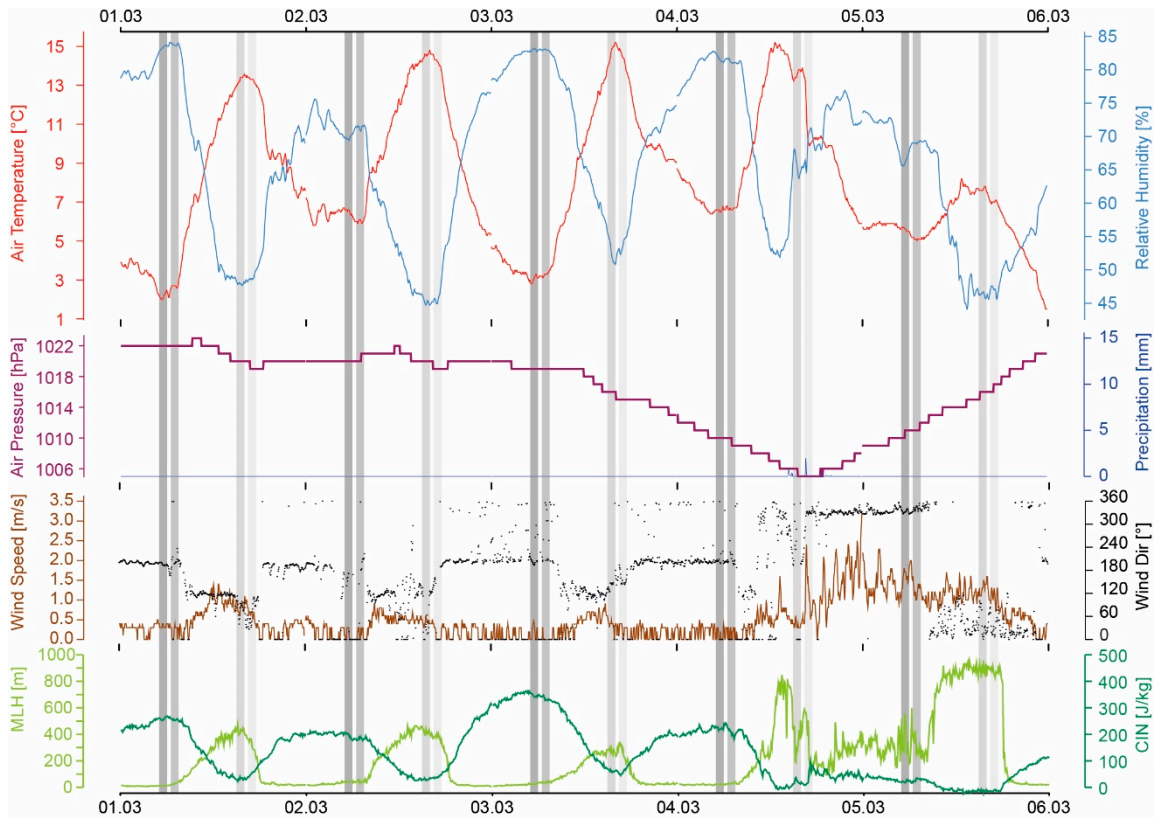

**Figure S2.** weather conditions during March measurement period. Grey bars represent daily measurement runs. Relative humidity, air temperature, and air pressure were measured at 2 m a.g.l. at the measurement station Mainz-Zitadelle, wind direction and speed at 10 m a.g.l and precipitation at 2 m a.g.l. at the measurement station Mainz-Mombach. The convective inhibition (CIN) and the mixing layer height (MLH) were measured with a radiometer at the headquarter of the state office for environment in Mainz.

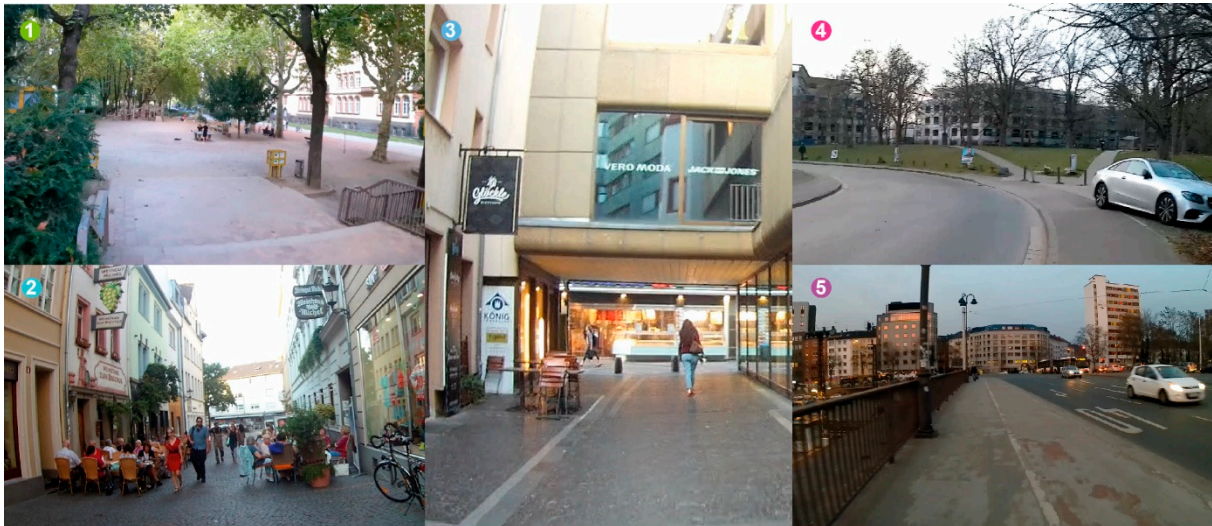

**Figure S3.** Pictures of the high polluted areas during the measurement campaigns in September (panels 1-3) and March (panels 4 and 5).

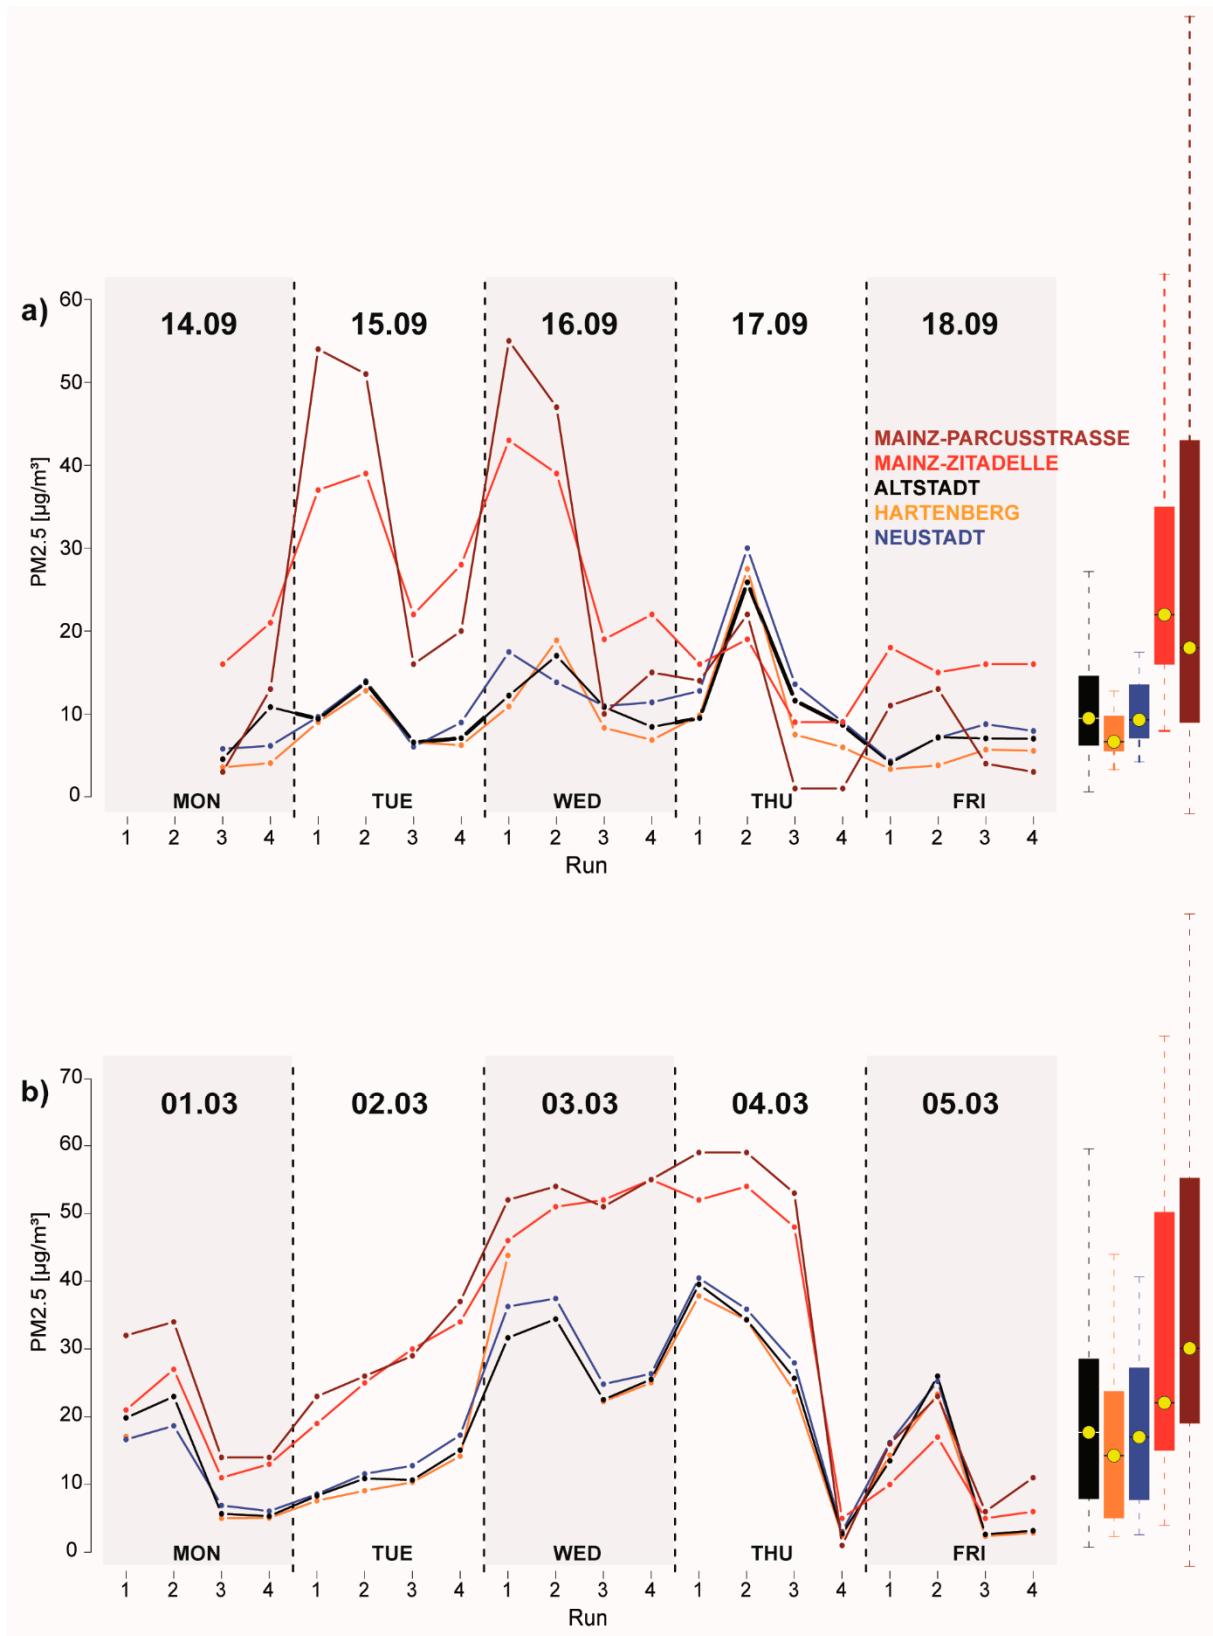

**Figure S4.** Mean PM<sub>10</sub> concentrations in the Altstadt, Hartenberg, Neustadt (black, blue and orange colors) and ZIMEN data from the Mainz-Parcusstraße and Mainz-Zitadelle (dark red and red colors) during the study periods in (a) September and (b) March with according boxplots.
